# Supplementary material
Source: PubMed Central journal article supplement (PMC4795281)
Supplement: jcsm.12.4.543s1.pdf [file jcsm.12.4.543s1.pdf]

**Table S1**

Associations between PAP adherence and rates of health care utilization for the subgroup with electronic downloads for identification of PAP adherence (Download only) and the full cohort with adherence identified from downloads or clinicians note of adherence (Download + Clinical).

|                                  | Partially Adjusted Model   |                     | Fully Adjusted Model       |                     |
|----------------------------------|----------------------------|---------------------|----------------------------|---------------------|
|                                  | Adherence with PAP therapy |                     | Adherence with PAP therapy |                     |
|                                  | Download only              | Download + Clinical | Download only              | Download + Clinical |
| Hospitalizations<br>IRR (95%CI)  | 0.45 (0.21, 0.96)          | 0.55 (0.33, 0.93)   | 0.59 (0.27, 1.27)          | 0.61 (0.35, 1.06)   |
| Emergency visits<br>IRR (95%CI)  | 1.11 (0.69, 1.78)          | 1.22 (0.84, 1.75)   | 1.20 (0.72, 1.98)          | 1.46 (0.99, 2.15)   |
| Outpatient visits<br>IRR (95%CI) | 0.99 (0.71, 1.36)          | 0.85 (0.68, 1.07)   | 1.07 (0.75, 1.53)          | 0.87 (0.67, 1.12)   |

Abbreviations: PAP, positive airway pressure; IRR, incidence rate ratio; 95%CI, 95% confidence interval.
